# Supplementary material for: Association of Neural Responses to Drug Cues With Subsequent Relapse to Stimulant Use
Source: PubMed Central journal article supplement (PMC6324538; doi:10.1001/jamanetworkopen.2018.6466), 2018-12-28
Supplement: jamanetwopen-1-e186466-s001.pdf [file jamanetwopen-1-e186466-s001.pdf]

## Supplementary Online Content

MacNiven KH, Jensen ELS, Borg N, Padula CB, Humphreys K, Knutson B. Association of neural responses to drug cues with subsequent relapse to stimulant use. *JAMA Network Open*. 2018;1(8):e186466. doi:10.1001/jamanetworkopen.2018.6466

**eAppendix 1.** Supplementary Methods

**eAppendix 2.** Supplementary Results

**eFigure 1.** Participant Flow Diagram

**eFigure 2.** Ratings of Cue Images in a Pilot Sample of Healthy Control Participants

**eFigure 3.** Self-reported Responses to Different Cue Images in Patients vs Controls

**eFigure 4.** Contrasts of Neural Responses to Food, Drug, and Neutral Trials in Patients and Controls

**eFigure 5.** Receiver-Operating Characteristic (ROC) Curves of Models Predicting Relapse

**eFigure 6.** Neural Features That Classify Relapse

**eFigure 7.** Correlation of NAcc Activity With Self-reported Positive Arousal for Different Stimuli in Patients vs Controls

**eTable 1.** Demographic Characteristics of Healthy Controls and Patients With a Stimulant Use Disorder

**eTable 2.** Demographic and Clinical Characteristics of Early Relapsing vs Abstaining Patients

**eTable 3.** Brain Regions With Significant Differences in Activation for Contrasts of Interest

**eTable 4.** Logistic Regression Results of NAcc Response to Drug Cues Predicting Treatment Outcome at 1, 3, and 6 Months Posttreatment

**eTable 5.** Whole-Brain Neural Features That Classify Relapse

**eReferences**

This supplementary material has been provided by the authors to give readers additional information about their work.

## **eAppendix 1. Supplementary Methods**

### ***Task images***

Images were selected from files freely available on the internet and were pre-tested for affective impact. Drug images included pictures of crack, cocaine, methamphetamine and related paraphernalia (e.g., a crack pipe, cocaine on a mirror). Food images included pictures of appetizing food (e.g., cookies, pizza). Neutral images included pictures of common objects (e.g., stapler, computer mouse). All images depicted unbranded items and contained no text. To ensure that selected stimuli elicited predicted affective responses in healthy participants, affective ratings were collected in an internet survey on a separate sample of pilot control participants located in the United States (n=24). Findings from this sample confirmed that food cue images elicited higher ratings of wanting and positive arousal than did other cue images, as predicted (see eFigure 2).

### ***Power analysis***

Our main objective was to test the viability of using brain activity to predict relapse after treatment. We conducted a power analysis to determine an adequate patient sample size for addressing this question. Assuming a 50% base rate of relapse and an odds-ratio effect size of 2.63 (as previously reported in the context of alcohol relapse as a hazard ratio<sup>1</sup>), power calculation indicated that a one-tailed logistic regression test with  $\alpha=.05$  and power  $(1-\beta) = .80$  would require 38 patients for a statistically valid sample. We aimed to enroll roughly the same number of controls as patients for group comparisons.

### ***Handling the clinical risks associated with cue reactivity studies***

Cue reactivity studies are designed to trigger craving responses for substances<sup>2</sup> and therefore can pose clinical risks to patients with substance use disorder. To mitigate against these risks,

the research team worked closely with the clinical treatment team to ensure any issues that arose during participation in the study were rapidly and adequately addressed. A member of the research team escorted patient participants between the treatment facility and study location to ensure safe transit. The treatment team was aware of the study protocol, including the cue-reactivity paradigm. Patients had access to social workers, case managers, psychologists and psychiatrists should they have needed supportive follow-up.

### ***Follow-up assessments***

Patients were notified that their participation would entail follow-up appointments one, three, and six months after the date of their treatment discharge. Follow-ups were not conducted with controls. At the end of the scanning session, patients completed a follow-up form requesting their contact information during this period, as well as information for two other close individuals (relatives, friends, or case worker) that could be contacted if the patient could not be reached. Patients then received three Amazon.com gift cards and were told that one card would be activated with \$50 after completing each follow-up appointment.

Patients were contacted by phone, text, and/or email for follow-up appointment scheduling and reminders. If a patient could not be reached, then collateral sources (relatives, friends, and/or VA records) were contacted for information about how to reach the patient as well as their potential stimulant use. At each follow up, stimulant use was assessed using the Time-Line Follow-Back method<sup>3</sup>. This self-report measure of relapse shows moderate-to-high consistency with urine toxicology screens<sup>4</sup>. Patients were asked to identify any dates since their last appointment that they used stimulants. Due to the sensitive nature of self-reporting use of illicit substances, we limited our interview questions to date(s) of use and did not systematically record quantity of use for a given use day. The Brief Addiction Monitor questionnaire was also administered at each follow-up to assess recent (past month) use of other illicit substances.

Follow-ups were conducted either via phone (80.8%) or in-person (19.2%), and urine toxicology screens were collected in a subset of the in-person interviews (53.3%). In every instance where urine drug samples were collected (n=8), they were consistent with patients' self-report<sup>5</sup>.

Because treatment was abstinence-based, relapse was defined as any stimulant use in the time since treatment or the previous assessment. Relapse status was assigned based on patients' self-reported stimulant use in a follow-up interview or based on available medical records that explicitly noted a patient's use of stimulants (in no case did these sources conflict). Fourteen of the patients continued in some form of monitored program (either outpatient or residential) following treatment discharge, which provided an additional source of corroborating evidence of recovery outcomes.

Stimulant use data was successfully collected for all but one patient at the 1-month assessment. Two additional patients were lost to follow-up prior to the 3-month assessment, and 3 additional patients were lost prior to the final follow-up targeted at 6 months posttreatment discharge. Patients lost to follow-up (total n=6) did not significantly differ from other patients on any of the variables reported in eTable 2. In the interest of both minimizing the number of patients lost to follow-up and having a relatively equal number of relapsers and abstainers, we analyzed treatment outcome in the sample of 33 patients with either confirmed abstinence or confirmed relapse 3 months after treatment discharge. In this sample, the median follow-up duration was 194 days (SD=83.0; range, 90-463 days).

### ***Neuroimaging scan acquisition***

Scans were acquired with a 3 Tesla GE Discover MR750 scanner and a Nova Medical 32-channel head coil. Functional (T2\*-weighted) images were acquired using an echo-planar imaging pulse sequence with the following parameters: TR=2 s, TE=25 ms, flip angle=77°,

FOV=232 × 232, 80 × 80 acquisition matrix with 46 axial slices (no slice gap). Images were acquired in an interleaved order and voxel dimensions were 2.9 mm<sup>3</sup>. Structural (T1-weighted) scans were acquired using GE's BRAVO sequence with the following parameters: TR=7.2 ms, TE=2.8 ms, flip angle=12°, FOV=256 × 230, 256 × 256 acquisition matrix with 186 slices, with slice thickness of 0.9 mm. Diffusion-weighted images were also acquired (described in a separate report).

### ***Data processing and analysis***

*Pre-processing:* the first six volumes of each functional scan were discarded to allow magnetization to reach steady-state. Images were then corrected for differences in slice acquisition times and head movement using Fourier interpolation, and smoothed using a 4 mm full-width at half maximum Gaussian kernel. Raw activity was then converted to percent signal change within each voxel and high-pass filtered to remove low frequency drift (admitting frequencies > 1 cycle per 90 s).

The first functional volume of each task was co-registered to a subject's T1-weighted anatomical volume in native space, and anatomical volumes were subsequently co-registered to an anatomical template (TT\_N27) in standard Talairach space. These two transformations were combined and applied to functional data, aligning all participants' data in a common standardized space (i.e., Talairach space).

*Regressors for whole-brain analyses:* A general linear model was fit to each voxel time series that included task-related regressors (described below) as well as nuisance regressors. Nuisance regressors included six rigid-body movement parameters estimated during motion correction, as well as averaged activity time series extracted from white matter and cerebrospinal fluid VOIs<sup>6</sup>. To model the task, regressors were defined to model activity during

the cue, image, and rating periods of each trial. Reaction time for ratings was also modeled as a regressor to capture signal variability associated with motor responses. Regressors of interest were then created which indicated each trial type (drug, food, alcohol, and neutral). For these regressors, each trial was modeled as an 8 second boxcar function over the entire trial duration, beginning with cue onset and terminating with the offset of the rating period. These regressors were then convolved using a single gamma function to account for hemodynamic lags (Cohen, 1996). Food vs neutral trials, drug vs neutral trials, and drug vs food trials were then contrasted, producing three contrast maps for each subject.

*VOI definition:* VOI masks of MPFC, NAcc, and VTA were created. The MPFC VOI was defined with an 8 mm diameter sphere bilaterally centered on Talairach coordinates  $\pm 5, 47, 0$ . The NAcc VOI was anatomically defined based on “Left-Accumbens” and “Right-Accumbens” labels in the Desai atlas. The VTA VOI was created based on a previously-described structural landmark demarcation of midbrain dopamine nuclei<sup>7</sup> (substantia nigra and VTA collectively). The bilateral VTA VOI was defined as the medial aspects of this mask, which included voxels spanning left and right coordinates from  $x=-5$  to  $x=6$ . Because we had no predictions regarding laterality, we averaged left and right VOIs to reduce the number of statistical tests.

*Whole-brain classification analysis:* Binary classifiers were trained to distinguish relapsers from abstainers based on patients’ whole brain responses to drug cues. To maximize the number of instances for each class, we defined relapsers as the first half of participants in the patient sample to relapse, producing 15 relapsers and 15 abstainers at 215 days posttreatment discharge (only patients with at least six months of follow-up data were included in this analysis, leaving 30 patients). Features were selected using a support vector machine classifier with recursive feature elimination (SVM-RFE) in the python toolbox scikit-learn<sup>8</sup>. Features were defined as voxelwise regression beta coefficients modeling activity during drug cue trials.

Beginning with all features within a whole brain gray matter mask, an SVM was trained to classify held-out test patients as a relapser or abstainer, using all other patients' data as the training set (LOSO cross-validation). Training sets were oversampled to contain even numbers of early abstainers and relapsers, setting the baseline probability of correctly classifying each held-out test subject to 50%. The least informative 5% of features (based on training set performance) were iteratively removed until <1% of features remained. This procedure was repeated for each regularization parameter C fixed at 0.001, .01, 0.1, 1.0, 10.0, 100.0, and 1000.0 to determine the best-performing combination of C value and percent features. After establishing the optimal combination of the c-parameter and feature cutoff, surviving features were projected back into brain space and documented (eFigure 6, eTable 5).

## eAppendix 2. Supplementary Results

### **Behavior**

Mixed-level repeated measures analyses of variance (ANOVAs) confirmed that group (patient, control; between-subjects factor) and cue type (food, drug, neutral; within-subjects factor) influenced self-reported ratings collected both during and after the scan as predicted. Specifically, positive arousal ratings showed main effects of cue ( $F(2,144)=123.7, p<.001, \epsilon^2=.590$ ) and group ( $F(1,144)=8.2, p=.006, \epsilon^2=.006$ ), but not an interaction of cue X group ( $F(2,144)=1.5, p=.221, \epsilon^2=.007$ ). Similarly, negative arousal ratings showed main effects of cue ( $F(2,144)=110.5, p<.001, \epsilon^2=.592$ ) and group ( $F(1,144)=4.1, p=.047, \epsilon^2=.001$ ), but not an interaction of cue X group ( $F(2,144)=.3, p=.770, \epsilon^2=.001$ ). Want ratings, however, showed main effects of cue ( $F(2,148)=130.1, p<.001, \epsilon^2=.501$ ) and group ( $F(1,148)=15.2, p<.001, \epsilon^2=.027$ ), as well as an interaction of cue X group ( $F(2,152)=13.6, p<.001, \epsilon^2=.052$ ). Post hoc *t*-tests confirmed that all participants (i.e., both controls and patients) reported wanting food cues more than neutral cues (controls:  $t(39)=5.77, p<.001, d=.91$ ; patients:  $t(35)=6.55, p<.001, d=1.09$ ), and drug cues less than neutral cues (controls:  $t(39)=-13.86, p<.001, d=2.19$ ; patients:  $t(35)=-2.14, p<.001, d=-.36$ ). Patients, however, still reported wanting drug cues more than controls ( $t(74)=5.61, p<.001, d=1.28$ ). Familiarity also showed main effects of cue ( $F(2,144)=169.5, p<.001, \epsilon^2=.320$ ) and group ( $F(1,144)=57.9, p<.001, \epsilon^2=.137$ ), as well as by an interaction of cue X group ( $F(2,144)=125.6, p<.001, \epsilon^2=.237$ ). Post hoc *t*-tests confirmed that patients reported more familiarity with drug cues than to controls ( $t(72)=11.43, p<.001, d=2.63$ ). Similarly constructed cue X group ANOVA control analyses of average reaction times while entering ratings revealed no significant differences across groups or group by cue type interactions.



### ***Relapse and NAcc drug responses by stimulant subgroups***

As reported in Methods, our patient sample (n=36) consisted of 28 methamphetamine users and 14 crack or powder cocaine users (6 patients met the criteria for abusing more than one stimulant). These subgroups did not vary with respect to NAcc response to drug cues (two-sample  $t$  test:  $t(40)=1.68$ ,  $p=.10$ ,  $d=.54$ ) nor with respect to relapse at 3 months ( $\chi^2$  test for equal proportions:  $\chi^2(1, N=39) = 2.73$ ,  $p=.10$ ).

**eFigure 1.** Participant Flow Diagram

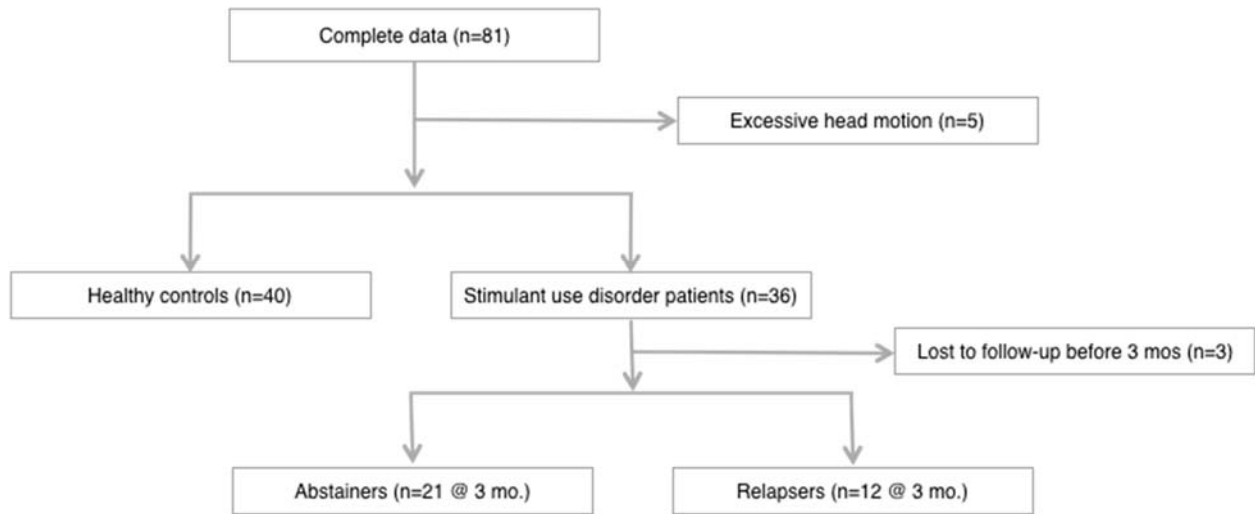

**eFigure 2.** Ratings of Cue Images in a Pilot Sample of Healthy Control Participants

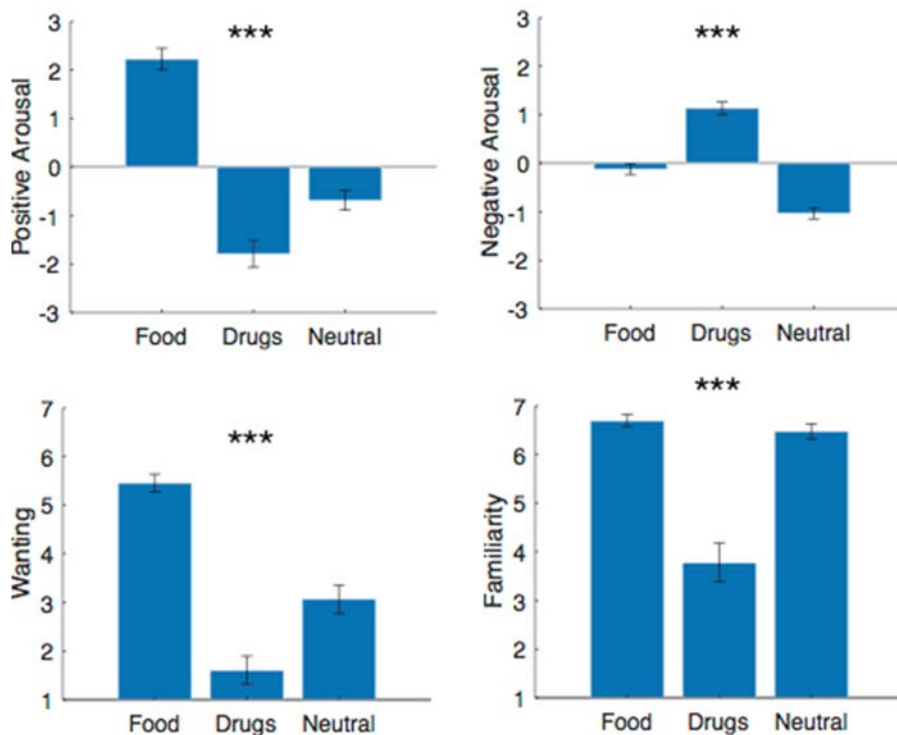

Affective ratings were collected from a separate group of participants (n=24) online using Amazon’s Mechanical Turk platform. Participants were located in the United States and were between 18-60 years of age. Participants rated each image on 7-point scales indicating valence (from “very negative” to “very positive”), arousal (from “not at all aroused” to “highly aroused”), wanting (from “strongly don’t want” to “strongly want”), and familiarity (from “not at all familiar” to “very familiar”). Valence and arousal ratings were then mean-deviated within subject and rotated to index positive arousal and negative arousal<sup>9</sup>, consistent with the circumplex model of affect<sup>10</sup>.

One-way ANOVAs revealed main effects of image type on all self-report measures. Positive arousal varied by image type  $F(2,46)=56.1$ ;  $p<.001$ ;  $\epsilon^2=.691$ ) and post-hoc *t*-tests indicated that food images were rated highest, followed by neutral images, with drug images rated lowest

(food vs neutral:  $t(23)=9.69$ ,  $p<.001$ ,  $d=1.98$ ; neutral vs drugs:  $t(23)=2.76$ ,  $p=.01$ ,  $d=.56$ ). A similar pattern was observed for wanting ratings ( $F(2,46)=54.9$ ;  $p=.000$ ;  $\epsilon^2=.617$ ). Post-hoc  $t$ -tests confirmed that participants rated food images as more wanted than neutral images, and rated neutral images as more wanted than drug images (food vs neutral:  $t(23)=7.36$ ,  $p<.001$ ,  $d=1.50$ ; neutral vs drugs:  $t(23)=3.42$ ,  $p=.002$ ,  $d=.70$ ). Negative arousal ratings varied by image type ( $F(2,46)=62.9$ ;  $p<.001$ ,  $\epsilon^2=.723$ ) and post-hoc  $t$ -tests revealed that drug images were rated highest while neutral images were rated lowest on negative arousal, with food images falling in between (drugs vs food:  $t(23)=6.31$ ,  $p<.001$ ,  $d=1.29$ ; food vs neutral:  $t(23)=5.36$ ,  $p<.001$ ,  $d=1.09$ ). Familiarity also differed by image type ( $F(2,46)=52.0$ ;  $p<.001$ ;  $\epsilon^2=.54$ ). Post-hoc  $t$ -tests confirmed that food images were rated as most familiar, neutral images were rated as slightly less familiar, and drug images were rated as least familiar (food vs neutral:  $t(23)=2.18$ ,  $p=.04$ ,  $d=.45$ ; neutral vs drugs:  $t(23)=7.08$ ,  $p<.001$ ,  $d=1.45$ ).

**eFigure 3.** Self-reported Responses to Different Cue Images in Patients vs Controls

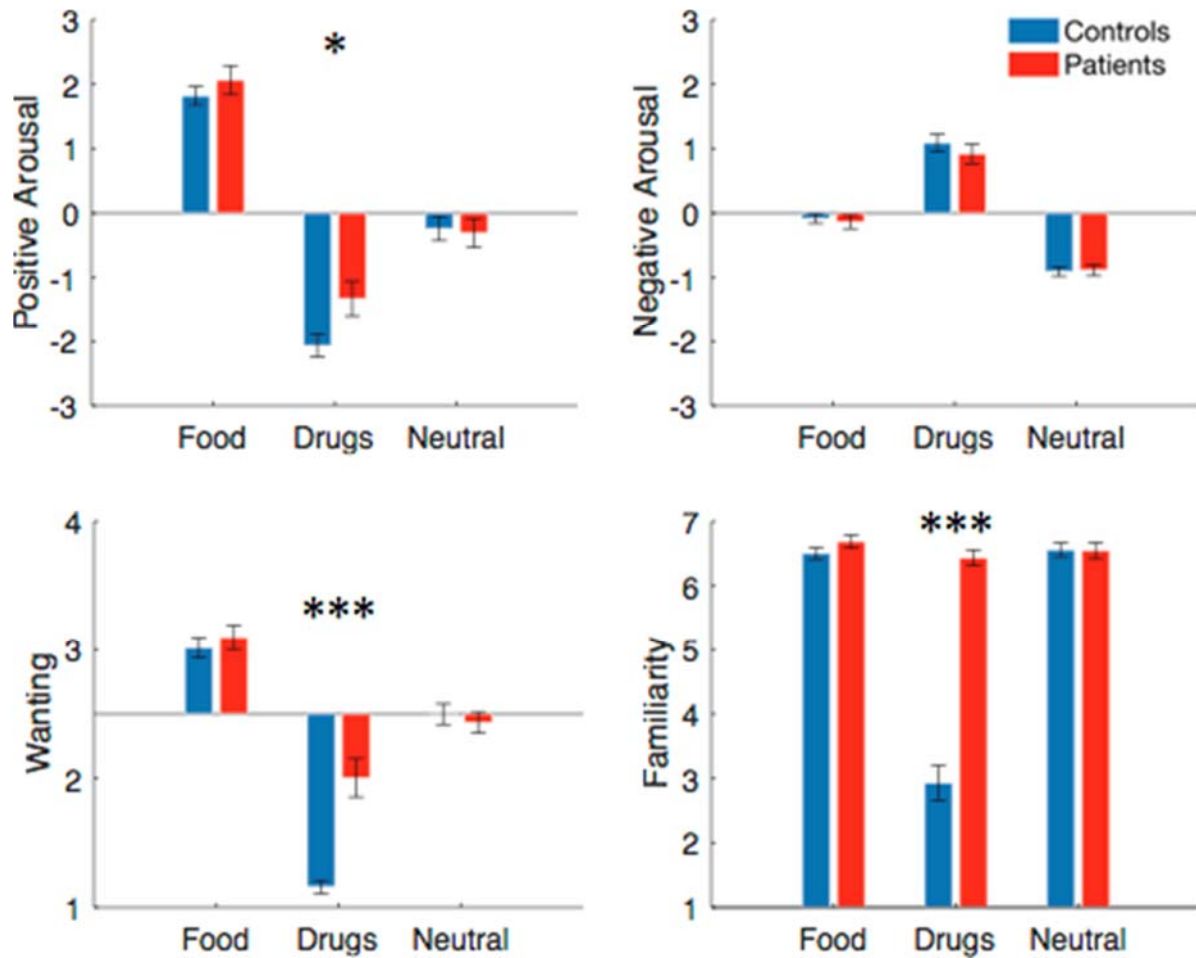

Average ratings of positive arousal (PA), negative arousal (NA), wanting, and familiarity for different image types (i.e., food, drug, neutral) for patients vs controls. Error bars depict  $\pm$ s.e.m. across subjects. Group ratings differed at  $*p < .05$ ,  $***p < .001$ , two-tailed  $t$ -tests.

**eFigure 4.** Contrasts of Neural Responses to Food, Drug, and Neutral Trials in Patients and Controls

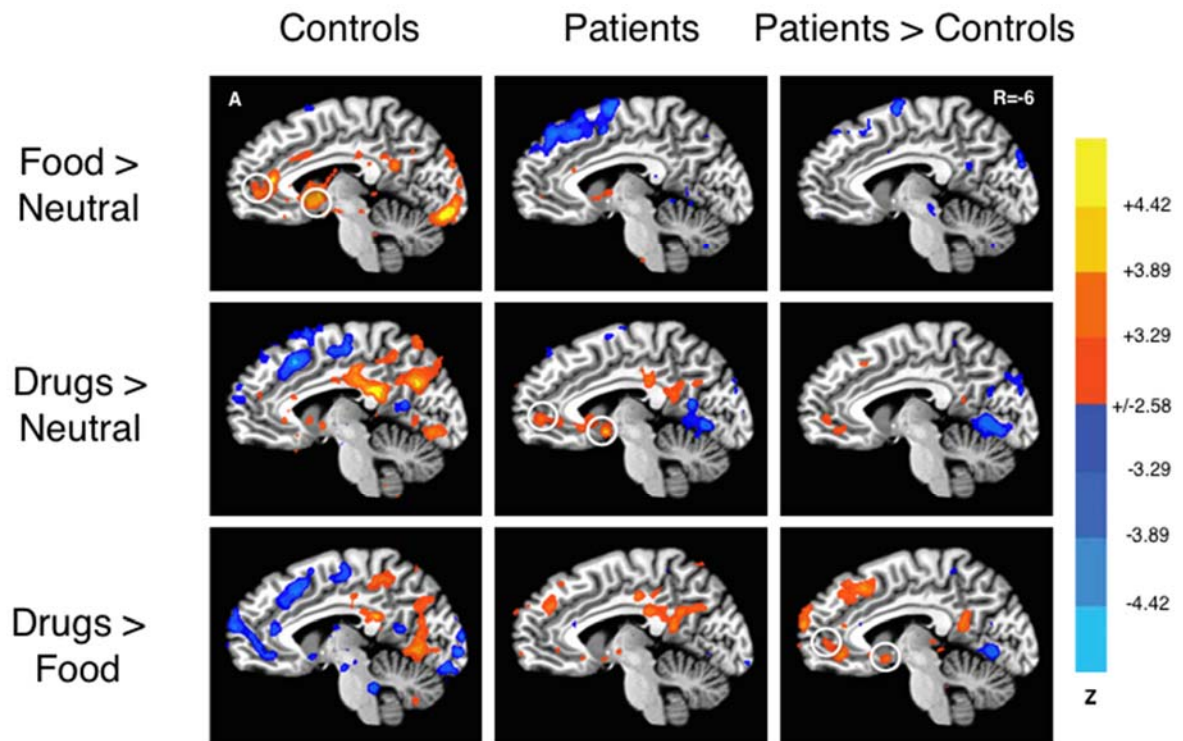

Whole-brain maps (sagittal view, 6 mm left of midline) show activations at a voxelwise threshold of  $p < .01$  (uncorrected for display, each color increment represents an order of magnitude increase). Activation maps specifically depict contrasts for controls (left), patients (middle), and patients vs controls (right). Circles highlight predicted contrasts in MPFC and NAcc volumes of interest. A, anterior; R, right.

**eFigure 5.** Receiver-Operating Characteristic (ROC) Curves of Models Predicting Relapse

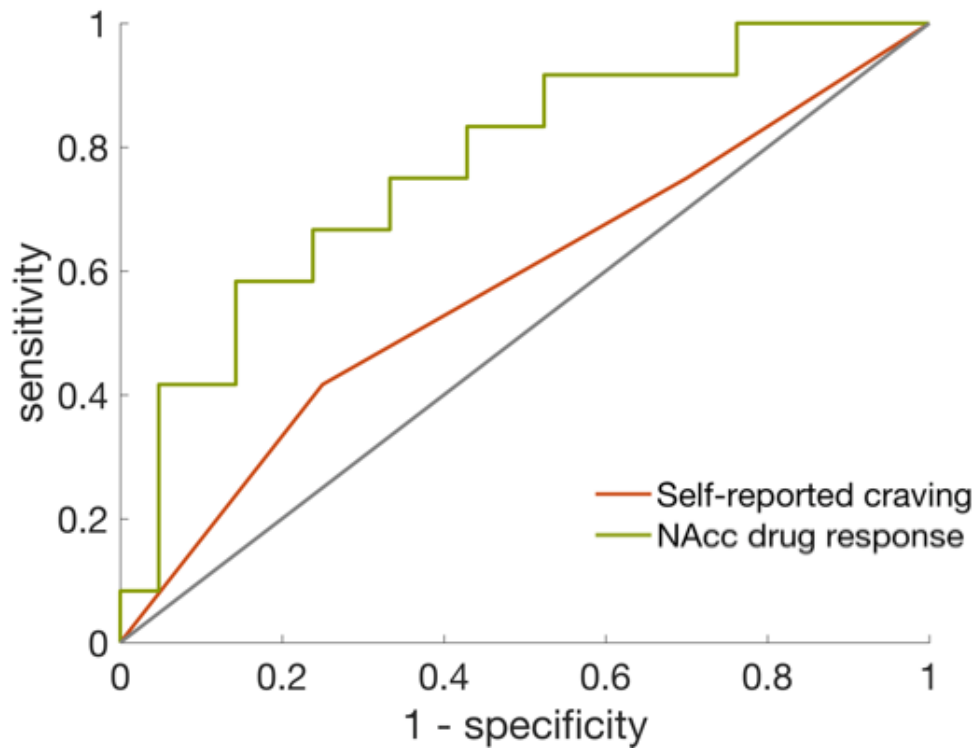

Curves illustrate the sensitivity and specificity of NAcc response to drug cues and self-reported craving in predicting relapse. Area under the curve (AUC) for NAcc drug response model is 77.0%; AUC for self-reported craving model is 57.7%.

**eFigure 6.** Neural Features That Classify Relapse

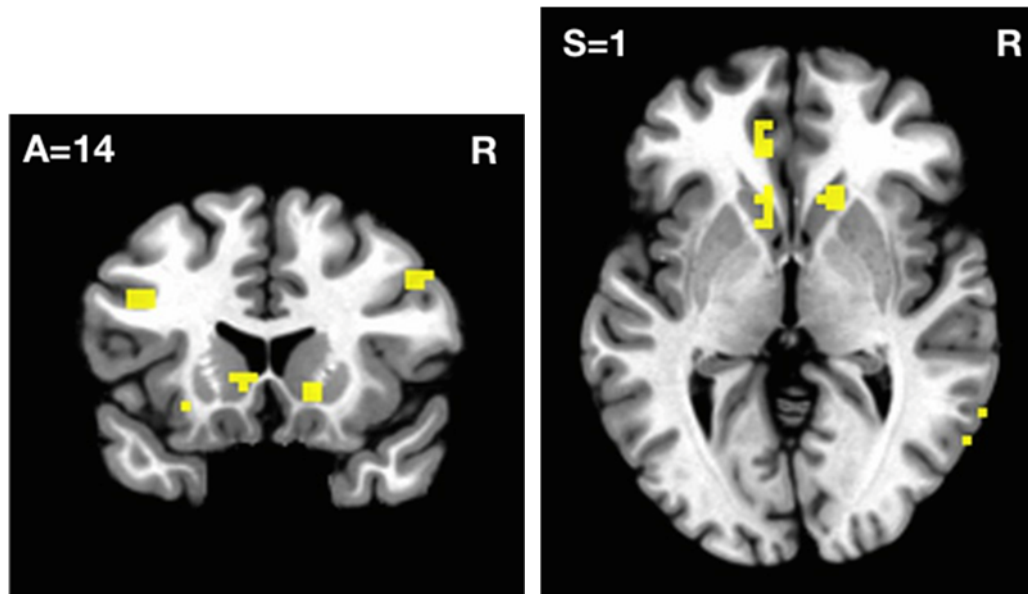

The highest classification accuracy of 60.0% (correctly classifying 18 out of 30 held-out test patients) was achieved with  $C=10.00$  and used roughly 5% of features<sup>11</sup>. The figure shows these features back-projected into standardized brain space with a cluster threshold of at least 10 contiguous voxels. Features clustered within the ventral striatum (including NAcc) bilaterally (depicted in the left image in coronal view and the right image in an axial view). A full list of brain regions containing the top 5% most informative features are listed in eTable 5. A, anterior; R, right; S, superior.



**eFigure 7.** Correlation of NAcc Activity With Self-reported Positive Arousal for Different Stimuli in Patients vs Controls

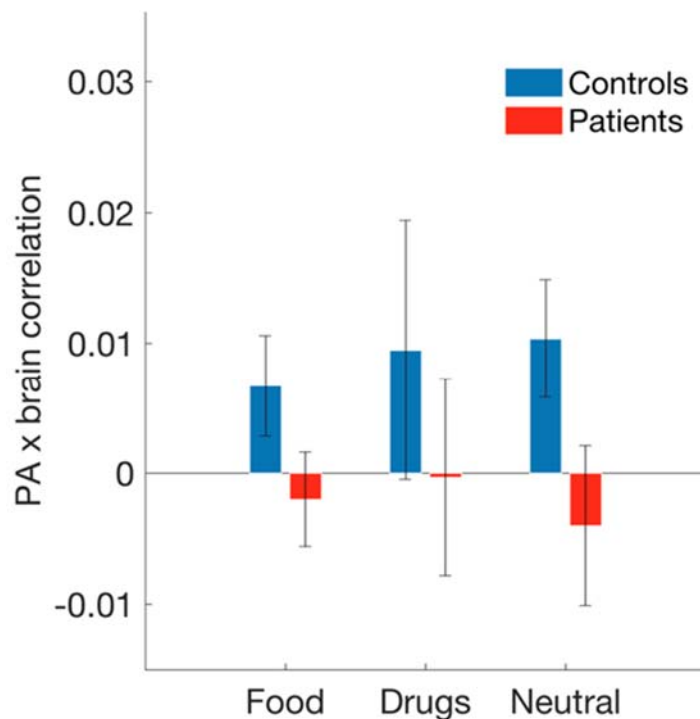

Parametric regressors weighted as a function of positive arousal ratings were created separately for food, drugs, and neutral stimuli. Seven controls and 6 patients had no variance in their ratings for drugs and so could not be included in this analysis. Mixed-level repeated measures analyses of variance (ANOVAs) indicated a main effect of group (patient, control; between-subjects factor) ( $F(1,122)=4.90, p=.03, \epsilon^2=.023$ ), but no significant effects of cue type (drug, food, neutral; within-subjects factor) ( $F(2,122)=.10, p=.94$ ), and no interaction of cue X group ( $F(2,122)=.10, p=.90$ ). NAcc, nucleus accumbens; PA, positive arousal.

**eTable 1.** Demographic Characteristics of Healthy Controls and Patients With a Stimulant Use Disorder

|                                      | <b>Controls (n=40)</b> | <b>Patients (n=36)</b> |
|--------------------------------------|------------------------|------------------------|
| Age (mean±sd years)*                 | 32.0±11.6              | 43.4±13.3              |
| Sex (% male)*                        | 60%                    | 94%                    |
| Race                                 |                        |                        |
| Asian                                | 28%                    | 14%                    |
| African-American                     | 3%                     | 17%                    |
| Caucasian                            | 53%                    | 40%                    |
| Hispanic                             | 10%                    | 20%                    |
| Education (mean±sd years completed)* | 15.9±2.8               | 12.9±1.5               |
| % Smokers*                           | 12%                    | 69%                    |
| % Veterans*                          | 28%                    | 100%                   |
| BDI scores (mean±sd)*                | 6.6±6.7                | 16.0±11.6              |
| BIS scores (mean±sd)*                | 58.7±8.5               | 72.6±12.2              |
| Discount rate (mean±sd of log(k))*   | -4.87±1.56             | -3.80±1.41             |

Between group comparisons were by *t*-test.

\*  $p < .05$ , uncorrected

BDI, Beck Depression Inventory; BIS, Barratt Impulsiveness Scale.

**eTable 2.** Demographic and Clinical Characteristics of Early Relapsing vs Abstaining Patients

|                                                                    | Early relapsers (n=12) | Early abstainers (n=21) |
|--------------------------------------------------------------------|------------------------|-------------------------|
| Age (mean±sd years)*                                               | 49.3±14.1              | 39.3±12.3               |
| Sex (% male)                                                       | 92%                    | 95%                     |
| Race                                                               |                        |                         |
| Asian                                                              | 17%                    | 15%                     |
| African-American                                                   | 33%                    | 10%                     |
| Caucasian                                                          | 33%                    | 40%                     |
| Hispanic                                                           | 8%                     | 25%                     |
| Education (mean±sd years completed)                                | 13.3/2.0               | 12.6/1.1                |
| % Smokers                                                          | 50%                    | 81%                     |
| BDI scores (mean±sd)                                               | 18.7±12.2              | 15.2±11.9               |
| BIS scores (mean±sd)                                               | 73.8±11.3              | 72.0±11.4               |
| Discount rate (mean±sd of log(k))                                  | -3.69±1.49             | -3.73±1.19              |
| % PTSD diagnosis                                                   | 33%                    | 52%                     |
| % Anxiety diagnosis                                                | 25%                    | 10%                     |
| % Depression diagnosis                                             | 25%                    | 38%                     |
| % Alcohol dependence <sup>a</sup>                                  | 50%                    | 52%                     |
| % Marijuana use <sup>b</sup>                                       | 67%                    | 52%                     |
| % Opiate dependence <sup>c</sup>                                   | 8%                     | 24%                     |
| % Poly-drug dependence (including alcohol, not including nicotine) | 83%                    | 81%                     |
| Years of stimulant use (mean±sd)                                   | 21.5±13.1              | 15.3±12.5               |
| Days sober prior to participation (median±sd)                      | 28.0±80.9              | 29.0±58.3               |

|                                                |          |          |
|------------------------------------------------|----------|----------|
| Days in rehab prior to participation (mean±sd) | 15.7±7.9 | 20.0±8.9 |
|------------------------------------------------|----------|----------|

Between group comparisons were by *t*-test.

\*  $p < .05$ , uncorrected

BDI, Beck Depression Inventory; BIS, Barratt Impulsiveness Scale; PTSD, Post-traumatic stress disorder.

<sup>a</sup> defined as score of 4 or higher on Alcohol Use Disorders Identification Test alcohol consumption questions (AUDIT-C)<sup>12</sup>

<sup>b</sup> based on recent use (i.e., month prior to treatment)

<sup>c</sup> diagnosis based on DSM-5 criteria

**eTable 3.** Brain Regions With Significant Differences in Activation for Contrasts of Interest

| Region                         | x   | y   | z   | Peak Z | Voxels |
|--------------------------------|-----|-----|-----|--------|--------|
| <b>Food &gt; Neutral</b>       |     |     |     |        |        |
| <b>Patients</b>                |     |     |     |        |        |
| Left & Right NAcc <sup>a</sup> | ±10 | 13  | -2  | 2.757  | 20     |
| Left Inferior Temporal Gyrus   | -42 | -72 | 0   | -5.356 | 653    |
| Right Fusiform Gyrus           | 42  | -46 | -18 | -5.118 | 325    |
| Left Inferior Frontal Gyrus    | -48 | 30  | -3  | -4.911 | 297    |
| Left Middle Frontal Gyrus      | -28 | 1   | 52  | -5.266 | 249    |
| Right Lingual Gyrus            | 25  | -69 | -15 | 5.249  | 147    |
| Left Medial Frontal Gyrus      | -4  | 27  | 46  | -4.667 | 106    |
| Left Lingual Gyrus             | -16 | -89 | 0   | 5.506  | 64     |
| Left Fusiform Gyrus            | -36 | -34 | -18 | -5.019 | 61     |
| Left Superior Frontal Gyrus    | -7  | -2  | 67  | -4.675 | 33     |
| <b>Controls</b>                |     |     |     |        |        |
| Left & Right MPFC <sup>a</sup> | ±4  | 46  | 1   | 3.670  | 24     |
| Left & Right NAcc <sup>a</sup> | ±10 | 13  | -2  | 5.035  | 20     |
| Left & Right VTA <sup>a</sup>  | ±3  | -16 | -11 | 3.081  | 26     |
| Left Lingual Gyrus             | -16 | -86 | -6  | 7.307  | 590    |
| Right Lingual Gyrus            | 25  | -69 | -9  | 7.382  | 565    |
| Right Insula                   | 36  | 7   | -6  | 6.024  | 320    |
| Left Middle Temporal Gyrus     | -45 | -63 | 17  | -4.889 | 222    |
| Left Anterior Cingulate        | -4  | 36  | 14  | 5.218  | 214    |
| Left Insula                    | -36 | 4   | -6  | 5.810  | 155    |
| Right Middle Temporal Gyrus    | 45  | -66 | 6   | -5.325 | 153    |
| Right Superior Frontal Gyrus   | 19  | 65  | 14  | 4.437  | 74     |

|                                      |     |     |     |        |     |
|--------------------------------------|-----|-----|-----|--------|-----|
| Right Cingulate Gyrus                | 4   | -28 | 38  | 4.610  | 71  |
| Left Middle Frontal Gyrus            | -22 | 36  | -6  | 5.644  | 69  |
| Right Posterior Cingulate            | 4   | -46 | 23  | 4.384  | 69  |
| Left Nucleus Accumbens               | -10 | 10  | -3  | 4.776  | 67  |
| Right Inferior Parietal Lobule       | 51  | -51 | 40  | 4.130  | 57  |
| Left Middle Frontal Gyrus            | -39 | 33  | -3  | -4.880 | 56  |
| Right Middle Frontal Gyrus           | 36  | 36  | 14  | 5.513  | 56  |
| Right Middle Frontal Gyrus           | 22  | 30  | -12 | 4.451  | 47  |
| Right Parahippocampal Gyrus          | 25  | -46 | -6  | 4.070  | 26  |
| <b><i>Patients &gt; Controls</i></b> |     |     |     |        |     |
| Right Superior Frontal Gyrus         | 10  | 27  | 52  | -4.590 | 61  |
| <b>Drugs &gt; Neutral</b>            |     |     |     |        |     |
| <b><i>Patients</i></b>               |     |     |     |        |     |
| Left & Right MPFC <sup>a</sup>       | ±4  | 46  | 1   | 3.075  | 24  |
| Left & Right NAcc <sup>a</sup>       | ±10 | 13  | -2  | 3.263  | 20  |
| Right Middle Occipital Gyrus         | 30  | -74 | 8   | 5.282  | 149 |
| Left Middle Occipital Gyrus          | -33 | -77 | 12  | 5.193  | 140 |
| Right Parahippocampal Gyrus          | 28  | -54 | -6  | 5.750  | 135 |
| Left Fusiform Gyrus                  | -28 | -54 | -9  | 4.716  | 61  |
| Right Cingulate Gyrus                | 1   | -22 | 35  | 4.649  | 57  |
| Left Middle Temporal Gyrus           | -45 | -34 | -3  | -4.399 | 49  |
| Left Middle Occipital Gyrus          | -39 | -60 | -3  | 4.029  | 31  |
| Right Fusiform Gyrus                 | 42  | -34 | -15 | 4.547  | 28  |
| Left Posterior Cingulate             | -7  | -57 | 14  | -4.515 | 27  |
| Right Insula                         | 39  | -2  | 0   | 4.968  | 26  |
| <b><i>Controls</i></b>               |     |     |     |        |     |

|                                      |     |     |     |        |      |
|--------------------------------------|-----|-----|-----|--------|------|
| Left Middle Occipital Gyrus          | -28 | -77 | 12  | 6.637  | 3727 |
| Right Fusiform Gyrus                 | 22  | -69 | -9  | 7.022  | 459  |
| Left Middle Frontal Gyrus            | -42 | 36  | -3  | -6.621 | 338  |
| Left Superior Frontal Gyrus          | -16 | 24  | 61  | -6.100 | 262  |
| Left Inferior Parietal Lobule        | -57 | -31 | 38  | 5.645  | 226  |
| Right Postcentral Gyrus              | 28  | -28 | 64  | -4.678 | 217  |
| Left Precentral Gyrus                | -28 | -28 | 61  | -5.370 | 217  |
| Right Middle Frontal Gyrus           | 28  | 47  | 20  | 5.433  | 131  |
| Right Cerebellar Tonsil              | 36  | -63 | -38 | -4.968 | 70   |
| Right Anterior Cingulate             | 7   | 36  | 17  | 4.144  | 35   |
| Left Medial Frontal Gyrus            | -2  | -11 | 52  | -4.121 | 34   |
| Right Middle Frontal Gyrus           | 42  | 4   | 55  | 4.071  | 32   |
| Right Middle Frontal Gyrus           | 25  | 27  | 38  | 4.371  | 31   |
| Right Inferior Frontal Gyrus         | 33  | 21  | -15 | 5.097  | 28   |
| Right Insula                         | 39  | 15  | 12  | 4.573  | 28   |
| Right Cingulate Gyrus                | 1   | 15  | 26  | 3.943  | 26   |
| Right Lingual Gyrus                  | 16  | -86 | 3   | 5.171  | 25   |
| Right Medial Frontal Gyrus           | 4   | 42  | 32  | 4.585  | 24   |
| <b><i>Patients &gt; Controls</i></b> |     |     |     |        |      |
| Right Supramarginal Gyrus            | 59  | -46 | 32  | -5.297 | 159  |
| Left Lingual Gyrus                   | -10 | -69 | -3  | -5.359 | 108  |
| Right Culmen                         | 13  | -60 | -6  | -4.287 | 72   |
| Right Middle Temporal Gyrus          | 62  | -34 | 0   | -3.993 | 32   |
| Right Superior Frontal Gyrus         | 25  | 47  | 17  | -3.992 | 25   |
| <b><i>Drugs &gt; Food</i></b>        |     |     |     |        |      |
| <b><i>Patients</i></b>               |     |     |     |        |      |

|                                |     |     |     |        |      |
|--------------------------------|-----|-----|-----|--------|------|
| Right Middle Occipital Gyrus   | 45  | -63 | -6  | 5.895  | 1268 |
| Left Middle Occipital Gyrus    | -39 | -72 | 8   | 6.244  | 1007 |
| Left Cingulate Gyrus           | -2  | -8  | 35  | 4.450  | 102  |
| Left Precuneus                 | -25 | -48 | 40  | 4.485  | 77   |
| Right Middle Frontal Gyrus     | 45  | 10  | 32  | 4.284  | 76   |
| Left Inferior Parietal Lobule  | -60 | -31 | 38  | 4.836  | 50   |
| Right Cuneus                   | 19  | -92 | 8   | -4.904 | 46   |
| Left Lingual Gyrus             | -16 | -92 | -0  | -4.390 | 41   |
| Right Middle Frontal Gyrus     | 42  | 27  | 17  | 4.097  | 36   |
| Right Middle Frontal Gyrus     | 30  | -8  | 46  | 4.028  | 25   |
| <b>Controls</b>                |     |     |     |        |      |
| Left & Right MPFC <sup>a</sup> | ±4  | 46  | 1   | -2.493 | 24   |
| Left & Right NAcc <sup>a</sup> | ±10 | 13  | -2  | -2.753 | 20   |
| Left & Right VTA <sup>a</sup>  | ±3  | -16 | -11 | -3.651 | 26   |
| Left Middle Temporal Gyrus     | -39 | -63 | 6   | 7.285  | 1690 |
| Right Middle Occipital Gyrus   | 45  | -66 | -3  | 6.823  | 1238 |
| Right Cuneus                   | 16  | -92 | 6   | -6.734 | 348  |
| Left Lingual Gyrus             | -16 | -89 | -3  | -6.769 | 312  |
| Right Fusiform Gyrus           | 39  | -46 | -12 | 5.454  | 279  |
| Left Inferior Parietal Lobule  | -60 | -31 | 29  | 6.431  | 168  |
| Right Precuneus                | 4   | -51 | 40  | 4.684  | 164  |
| Left Middle Frontal Gyrus      | -33 | 36  | -6  | -4.979 | 143  |
| Left Medial Frontal Gyrus      | -10 | 15  | 46  | -4.533 | 115  |
| Left Superior Frontal Gyrus    | -10 | 62  | 23  | -4.588 | 69   |
| Right Cerebellar Tonsil        | 36  | -60 | -35 | -4.810 | 59   |
| Left Postcentral Gyrus         | -36 | -25 | 46  | -4.030 | 58   |



|                                      |     |     |     |        |    |
|--------------------------------------|-----|-----|-----|--------|----|
| Left Inferior Parietal Lobule        | -28 | -43 | 40  | 4.346  | 43 |
| <b><i>Patients &gt; Controls</i></b> |     |     |     |        |    |
| Left & Right NAcc <sup>a</sup>       | ±10 | 13  | -2  | 2.528  | 20 |
| Left & Right VTA <sup>a</sup>        | ±3  | -16 | -11 | 3.127  | 26 |
| Left Middle Frontal Gyrus            | -33 | 33  | -6  | 4.601  | 70 |
| Left Medial Frontal Gyrus            | -2  | 24  | 43  | 4.347  | 30 |
| Left Lingual Gyrus                   | -7  | -69 | -3  | -4.632 | 26 |

For whole brain map results, voxels were thresholded at  $p < .001$  (uncorrected) and cluster-level thresholded at 23 or more contiguous voxels to produce clusters significant at  $p < .05$ , corrected. For volumes of interest, statistics were Bonferroni corrected for tests in three bilateral mesolimbic regions, such that only results at  $p < .0167$  are reported. Coordinates are in Talairach space.

MPFC, medial prefrontal cortex; NAcc, nucleus accumbens; VTA, ventral tegmental area.

<sup>a</sup>VOI-based analysis; voxels within VOI mask were averaged to produce a single Z-score for each VOI. Reported coordinates are the mean of each VOI mask.

**eTable 4.** Logistic Regression Results of NAcc Response to Drug Cues Predicting Treatment Outcome at 1, 3, and 6 Months Posttreatment<sup>a</sup>

|                                                              | 1 month                | 3 months             | 6 months            |
|--------------------------------------------------------------|------------------------|----------------------|---------------------|
| <i>n</i> relapsers /<br><i>n</i> patient sample <sup>b</sup> | 9 / 35                 | 12 / 33              | 15 / 30             |
| Intercept                                                    | -1.25±0.45**;<br>-2.78 | -0.69±0.42;<br>-1.61 | 0.08±0.45;<br>0.19  |
| NAcc drug response                                           | 0.95±0.43*;<br>2.19    | 1.24±0.48**;<br>2.57 | 1.52±0.60*;<br>2.51 |
| Pseudo R <sup>2</sup>                                        | 0.162                  | 0.246                | 0.277               |
| AIC                                                          | 38.45                  | 38.49                | 35.31               |
| Classification<br>Accuracy (LOSO %) <sup>c</sup>             | 71.4%*                 | 72.7%**              | 66.7%*              |

Statistics are standardized regression coefficients ± standard errors; followed by Z-scores.

\* $p < .05$ ; \*\*  $p < .01$

NAcc, nucleus accumbens; AIC, Akaike information criterion.

<sup>a</sup> Patients who relapsed within 40, 100, and 220 days posttreatment were considered relapsers by 1, 3, and 6 months posttreatment, respectively.

<sup>b</sup> Only patients with confirmed abstinence or relapse at the target date were included each analysis (i.e., patients lost to follow-up were excluded for relevant time periods).

<sup>c</sup> Classification accuracy was calculated based on leave-one-subject-out (LOSO) cross-validation. Training sets were oversampled to contain even numbers of abstainers and relapsers, setting the baseline probability of correctly classifying each held-out test patient to 50%.

**eTable 5.** Whole-Brain Neural Features That Classify Relapse

| Region                        | x   | y   | z   | Peak feature weight, <i>w</i> | Voxels |
|-------------------------------|-----|-----|-----|-------------------------------|--------|
| Left Cingulate Gyrus          | -10 | -54 | 29  | .002                          | 96     |
| Right Middle Temporal Gyrus   | 42  | -60 | 26  | .002                          | 78     |
| Left Middle Frontal Gyrus     | -48 | 30  | 29  | .002                          | 58     |
| Left Uncus                    | -30 | -16 | -29 | .002                          | 48     |
| Left Precuneus                | -19 | -57 | 32  | .002                          | 41     |
| Left Cingulate Gyrus          | -2  | -25 | 38  | .002                          | 37     |
| Right Uncus                   | 36  | -8  | -29 | .002                          | 30     |
| Right Superior Frontal Gyrus  | 19  | 50  | -9  | .002                          | 27     |
| Right Medial Frontal Gyrus    | 16  | -11 | 55  | -.002                         | 27     |
| Left Middle Temporal Gyrus    | -42 | -74 | 29  | .002                          | 26     |
| Left Cerebellum               | -19 | -74 | -18 | -.002                         | 25     |
| Left Inferior Parietal Lobule | -45 | -54 | 43  | .002                          | 25     |
| Right Middle Frontal Gyrus    | 48  | 30  | 26  | .002                          | 24     |
| Left Superior Frontal Gyrus   | -25 | 50  | 26  | .001                          | 23     |
| Right Inferior Temporal Gyrus | 59  | -54 | -6  | .002                          | 20     |
| Right Cingulate Gyrus         | 7   | 30  | 26  | .002                          | 19     |
| Left Inferior Parietal Lobule | -54 | -37 | 43  | .002                          | 19     |
| Left Nucleus Accumbens        | -7  | 10  | -3  | .002                          | 18     |
| Right Precuneus               | 7   | -63 | 35  | .001                          | 16     |
| Left Insula                   | -30 | 12  | -6  | .002                          | 15     |
| Right Nucleus Accumbens       | 16  | 18  | -3  | .002                          | 15     |
| Left Insula                   | -45 | 10  | 14  | .001                          | 15     |
| Right Cingulate Gyrus         | 7   | -40 | 35  | .002                          | 15     |
| Right Precuneus               | 28  | -69 | 49  | .002                          | 13     |
| Left Anterior Cingulate       | -10 | 39  | 0   | .002                          | 12     |

|                                |     |     |     |       |    |
|--------------------------------|-----|-----|-----|-------|----|
| Right Superior Temporal Gyrus  | 48  | -46 | 14  | .002  | 12 |
| Left Middle Temporal Gyrus     | -48 | -66 | 20  | -.002 | 12 |
| Right Superior Frontal Gyrus   | 13  | 56  | 35  | -.001 | 12 |
| Left Middle Temporal Gyrus     | -45 | -74 | 14  | .002  | 11 |
| Left Superior Frontal Gyrus    | -36 | 42  | 32  | .002  | 11 |
| Right Cerebellum               | 16  | -69 | -18 | -.002 | 10 |
| Right Inferior Parietal Lobule | 65  | -31 | 26  | -.002 | 10 |

The 5% most informative features were selected using an SVM-RFE classifier with C parameter of 10.00 and then back-projected into standardized brain space (Talairach warped) and cluster-thresholded at 10 voxels. Positive weights indicate greater drug cue-induced activity for relapsers, while negative weights indicate greater drug cue-induced activity for abstainers. Coordinates are in Talairach space.

## eReferences

1. Reinhard, I. *et al.* A comparison of region-of-interest measures for extracting whole brain data using survival analysis in alcoholism as an example. *J. Neurosci. Methods* **242**, 58–64 (2015).
2. Drummond, D. C. What does cue-reactivity have to offer clinical research? *Addiction* **95**, 129–144 (2000).
3. Sobell, L. C. & Sobell, M. B. Timeline Follow-Back. in *Measuring Alcohol Consumption* 41–72 (1992). doi:10.1007/978-1-4612-0357-5\_3
4. Hersh, D., Mulgrew, C. L., Van Kirk, J. & Kranzler, H. R. The validity of self-reported cocaine use in two groups of cocaine abusers. *J. Consult. Clin. Psychol.* **67**, 37–42 (1999).
5. Calhoun, P. S. *et al.* Drug use and validity of substance use self-reports in veterans seeking help for posttraumatic stress disorder. *J. Consult. Clin. Psychol.* **68**, 923–927 (2000).
6. Chang, C. & Glover, G. H. Effects of model-based physiological noise correction on default mode network anti-correlations and correlations. *Neuroimage* **47**, 1448–59 (2009).
7. Hennigan, K., D'Ardenne, K. & McClure, S. M. Distinct Midbrain and Habenula Pathways Are Involved in Processing Aversive Events in Humans. *J. Neurosci.* **35**, 198–208 (2015).
8. Pedregosa, F. *et al.* Scikit-learn: Machine Learning in Python. *J. Mach. Learn. Res.* **12**, 2825–2830 (2012).
9. Knutson, B., Katovich, K. & Suri, G. Inferring affect from fMRI data. *Trends Cogn. Sci.* **18**, 422–8 (2014).
10. Watson, D., Wiese, D., Vaidya, J. & Tellegen, A. The two general activation systems of affect: Structural findings, evolutionary considerations, and psychobiological evidence. *J. Pers. Soc. Psychol.* **76**, 820–838 (1999).
11. Ferenczi, E. A. *et al.* Prefrontal cortical regulation of brainwide circuit dynamics and

reward-related behavior. *Science* (80-. ). **351**, aac9698-aac9698 (2016).

12. Bush, K. *et al.* The audit alcohol consumption questions (audit-c): An effective brief screening test for problem drinking. *Arch. Intern. Med.* **158**, 1789–1795 (1998).
